# Supplementary material
Source: PubMed Central journal article supplement (PMC5822195)

## Supplementary Online Content

Murdock BJ, Zhou T, Kashlan SR, Little RJ, Goutman SA, Feldman EL. Correlation of peripheral immunity with rapid amyotrophic lateral sclerosis progression. *JAMA Neurol*. Published online September 25, 2017. doi:10.1001/jamaneurol.2017.2255

**eTable 1.** Titrated Monoclonal Fluorochrome-Labeled Antibodies Used

**eTable 2.** Expression and Function of Surface Markers

**eTable 3.** Regression Analysis of CD11b<sup>+</sup> Nongranulocyte Myeloid Cells

**eFigure 1.** Myeloid Cell Population Gating Strategy

**eFigure 2.** Lymphoid Cell Population Gating Strategy

**eFigure 3.** Myeloid Cell Subpopulation Identification

**eFigure 4.** Changes in Immune Cell Subpopulations in Participants With ALS

**eFigure 5.** Total Number and Changes in CD11b<sup>+</sup>CD14<sup>+</sup>CD16<sup>+</sup> Cell Subpopulations in Participants With ALS

**eFigure 6.** Total Number and Changes in CD11b<sup>+</sup>CD14<sup>+</sup>CD16<sup>-</sup> Cell Subpopulations in Participants With ALS

**eFigure 7.** Total Number and Changes in CD11b<sup>+</sup>CD14<sup>-</sup>CD16<sup>+</sup> Cell Subpopulations in Participants With ALS

**eFigure 8.** Surface Marker Expression of CD14<sup>-</sup>CD16<sup>-</sup>HLA-DR<sup>+</sup> Myeloid Cells

This supplementary material has been provided by the authors to give readers additional information about their work.

| <b>Supplementary Table 1</b> |              |              |               |
|------------------------------|--------------|--------------|---------------|
| <b>Surface Marker</b>        | <b>Clone</b> | <b>Color</b> | <b>Vendor</b> |
| BDCA-1                       | L161         | APC          | Biolegend     |
| CCR2                         | K036C2       | APC          | Biolegend     |
| CCR3                         | 5E8          | PE           | Biolegend     |
| CCR4                         | L291H4       | APC          | Biolegend     |
| CCR7                         | G043H7       | BV421        | Biolegend     |
| CD3                          | UCHT1        | FITC         | Biolegend     |
| CD4                          | RPA-T4       | PerCP-Cy/5.5 | Biolegend     |
| CD8                          | HIT8a        | APC-Cy7      | Biolegend     |
| CD11b                        | M1/70        | PerCP-Cy/5.5 | Biolegend     |
| CD11b-activated              | CBRM1/5      | FITC         | Biolegend     |
| CD11c                        | 3.9          | APC          | Biolegend     |
| CD14                         | M $\phi$ P9  | APC-Cy7      | BD            |
| CD15                         | HI98         | PE-Cy7       | Biolegend     |
| CD16                         | 3G8          | PE           | BD            |
| CD32                         | FUN-2        | APC          | Biolegend     |
| CD34                         | 561          | FITC         | Biolegend     |
| CD40                         | 5C3          | FITC         | Biolegend     |
| CD40L                        | 24-31        | BV421        | Biolegend     |
| CD45RA                       | HI100        | BV421        | Biolegend     |
| CD56                         | HCD56        | APC          | Biolegend     |
| CD57                         | HCD57        | APC          | Biolegend     |
| CD62L                        | DREG-56      | FITC         | Biolegend     |
| CD64                         | 10.1         | APC          | Biolegend     |
| CD69                         | FN50         | BV421        | Biolegend     |
| CD80                         | 2D10         | FITC         | Biolegend     |
| CD86                         | IT2.2        | APC          | Biolegend     |
| CD94                         | DX22         | APC          | Biolegend     |
| CX3CR1                       | 2A9-1        | PE-Cy7       | Biolegend     |
| CXCR3                        | G025H7       | BV421        | Biolegend     |
| HLA-DR                       | Tu39         | BV421, FITC  | Biolegend     |
| IgM                          | G20-127      | APC          | BD            |
| KIR2 (DL2/DL3)               | DX27         | APC          | Biolegend     |
| NKG2D                        | 1D11         | BV421        | Biolegend     |
| Nkp30                        | P30-15       | APC          | Biolegend     |
| Nkp46                        | 9E2          | BV421        | Biolegend     |
| TCR $\alpha/\beta$           | IP26         | BV421        | Biolegend     |
| TLR2                         | T2.5         | FITC         | Biolegend     |
| TLR4                         | HTA125       | APC          | Biolegend     |
| TRAIL                        | RIK-2        | APC          | Biolegend     |

| <b>Supplementary Table 2</b> |                                                      |                                           |                       |
|------------------------------|------------------------------------------------------|-------------------------------------------|-----------------------|
| <b>Surface Marker</b>        | <b>Immune Role</b>                                   | <b>Population Expression</b>              | <b>Antibody Clone</b> |
| CD11c                        | Marker of maturity on many myeloid cells             | CD14+ CD16+<br>CD14+ CD16-<br>CD14- CD16+ | 3.9                   |
| BDCA-1                       | Marker on dendritic cell subpopulations              | CD14- CD16-                               | L161                  |
| CD83                         | Marker on dendritic cell subpopulations              | None                                      | HB15e                 |
| CCR2                         | Receptor for monocyte chemoattractant protein        | CD14+ CD16+<br>CD14+ CD16-<br>CD14- CD16- | K036C2                |
| CD62L                        | Adhesion molecule used in leukocyte trafficking      | CD14+ CD16-<br>CD14- CD16+<br>CD14- CD16  | DREG-56               |
| CX3CR1                       | Receptor for the fractalkine ligand                  | All                                       | 2A9-1                 |
| CD40                         | Myeloid activation receptor                          | CD14+ CD16+<br>CD14- CD16+<br>CD14- CD16- | 5C3                   |
| CD80                         | Antigen presenting cell co-stimulation molecule      | None                                      | 2D10                  |
| CD86                         | Antigen presenting cell co-stimulation molecule      | CD14+ CD16+<br>CD14+ CD16-<br>CD14- CD16+ | IT2.2                 |
| CD11b <sup>activated</sup>   | Activated form of CD11b                              | None                                      | CBRM1/5               |
| HLA-DR                       | MHC II surface receptor used in antigen presentation | All                                       | Tu39                  |
| TLR2                         | Receptor for pathogen-associated molecular patterns  | All                                       | T2.5                  |
| TLR4                         | Receptor for pathogen-associated molecular patterns  | CD14+ CD16+<br>CD14+ CD16-<br>CD14- CD16+ | HTA125                |

| Supplemental Table 3 – Regression Analysis of CD11b+ Non-Granulocyte Myeloid Cells |                               |        |                                     |              |        |
|------------------------------------------------------------------------------------|-------------------------------|--------|-------------------------------------|--------------|--------|
| Surface Marker                                                                     | Leukocyte Change (normalized) |        | ALSFRS-R Change (normalized)        | Participants |        |
| <b>CD14+ CD16+ Monocytes</b>                                                       |                               |        |                                     |              |        |
| Surface Marker                                                                     | MFI/year                      | SD     | Score per year per leukocyte change | P-value      | Number |
| HLADR                                                                              | -0.0006                       | 1.2994 | 1.1819                              | 0.5712       | 24     |
| CD11c                                                                              | -0.3212                       | 1.6508 | -0.7826                             | 0.5565       | 24     |
| CD40                                                                               | 0.1411                        | 0.3546 | -11.1803                            | 0.1242       | 24     |
| CD62L                                                                              | 0.4423                        | 0.6009 | -4.8210                             | 0.1614       | 24     |
| CD86                                                                               | 0.2117                        | 1.2221 | 2.8163                              | 0.4454       | 12     |
| CCR2                                                                               | 0.0750                        | 1.0963 | 0.0294                              | 0.9920       | 24     |
| CX3CR1                                                                             | 0.5860                        | 2.8813 | 4.1353                              | 0.0310       | 12     |
| TLR2                                                                               | -0.0516                       | 0.3901 | -2.8284                             | 0.5707       | 19     |
| TLR4                                                                               | 0.0520                        | 0.6723 | 3.8637                              | 0.3139       | 17     |
| <b>CD14+ CD16- Monocytes</b>                                                       |                               |        |                                     |              |        |
| Surface Marker                                                                     | MFI/year                      | SD     | Score per year per leukocyte change | P-value      | Number |
| HLADR                                                                              | 0.0118                        | 1.1557 | 1.9014                              | 0.5578       | 24     |
| CD11c                                                                              | -1.2774                       | 2.1522 | 0.0634                              | 0.9788       | 24     |
| CD40                                                                               | 0.1540                        | 0.9866 | 0.5766                              | 0.9341       | 24     |
| CD62L                                                                              | 0.4759                        | 1.4270 | -2.5597                             | 0.3157       | 24     |
| CD86                                                                               | -0.2157                       | 0.4566 | -12.9637                            | 0.1480       | 12     |
| CCR2                                                                               | -0.0378                       | 1.0705 | -8.3085                             | 0.2231       | 24     |
| CX3CR1                                                                             | 0.4510                        | 2.6939 | 6.2899                              | 0.0639       | 12     |
| TLR2                                                                               | 0.0197                        | 1.1223 | -3.6077                             | 0.3692       | 19     |
| TLR4                                                                               | -0.4237                       | 1.5322 | 3.6594                              | 0.2625       | 17     |
| <b>CD14- CD16+ Cells</b>                                                           |                               |        |                                     |              |        |
| Surface Marker                                                                     | 10 <sup>4</sup> cells/year    | SD     | Score per year per leukocyte change | P-value      | Number |
| HLADR                                                                              | -0.0408                       | 0.1244 | 23.7533                             | 0.5233       | 23     |
| CD11c                                                                              | -0.0558                       | 0.1601 | 11.0610                             | 0.7701       | 23     |
| CD40                                                                               | -0.0097                       | 0.0980 | 0.7804                              | 0.9881       | 23     |
| CD62L                                                                              | -0.0065                       | 0.1061 | -58.5218                            | 0.0253       | 23     |
| CD86                                                                               | -0.0269                       | 0.1143 | -45.9212                            | 0.5431       | 12     |
| CX3CR1                                                                             | -0.0618                       | 0.2403 | -1.2713                             | 0.9304       | 11     |
| TLR2                                                                               | -0.0184                       | 0.0955 | 2.2583                              | 0.9374       | 18     |
| <b>CD14- CD16- Cells</b>                                                           |                               |        |                                     |              |        |
| Surface Marker                                                                     | 10 <sup>4</sup> cells/year    | SD     | Score per year per leukocyte change | P-value      | Number |
| HLADR                                                                              | 0.0016                        | 0.1495 | -24.3453                            | 0.5120       | 23     |
| CD11c                                                                              | -0.0323                       | 0.1879 | -0.5498                             | 0.9866       | 23     |
| CD40                                                                               | 0.0332                        | 0.1476 | -9.3630                             | 0.8174       | 23     |
| CD62L                                                                              | 0.0181                        | 0.1654 | -25.2739                            | 0.3652       | 23     |
| CD86                                                                               | -0.0368                       | 0.0552 | -224.2873                           | 0.0399       | 11     |
| BDCA-1                                                                             | 0.0153                        | 0.1322 | 61.4612                             | 0.2098       | 23     |
| CCR2                                                                               | -0.0195                       | 0.0793 | 0.8807                              | 0.9812       | 23     |
| CX3CR1                                                                             | -0.0272                       | 0.2496 | 61.4058                             | 0.0255       | 11     |
| TLR2                                                                               | 0.0240                        | 0.1236 | -56.6426                            | 0.1942       | 18     |

**Abbreviations:** MFI = Median Fluorescent Intensity; SD = Standard Deviation

## Supplementary Figure 1

### Myeloid Cell Population Gating Strategy

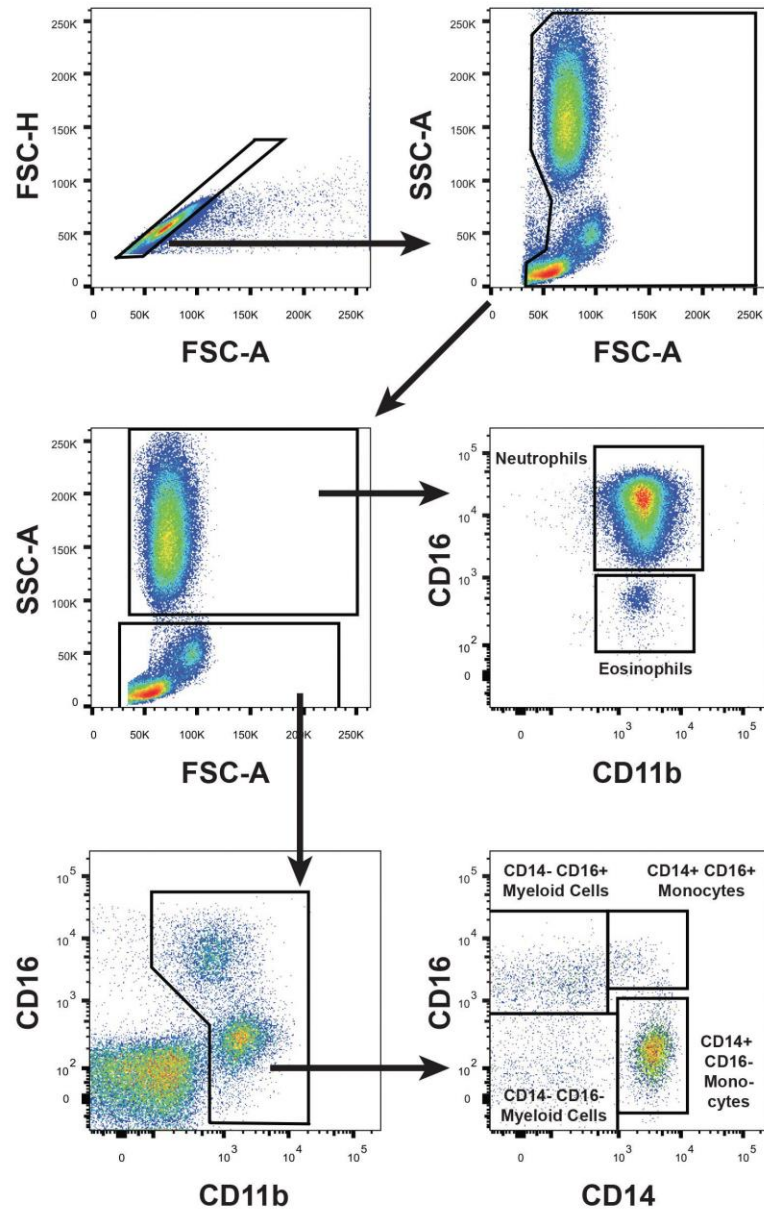

**Supplementary Figure 1.** Following isolation, peripheral blood immune cells were stained with a combination of CD11b, CD14, and CD16. Doublets and debris were first excluded, and then cells were gated into SSC-high and SSC-low populations. The SSC-high population was further subdivided into CD16-high (neutrophil) and CD16-low (eosinophil) populations. CD11b+ cells were selected from the SSC-low population, and further subdivided into four groups based on CD14 and CD16 expression.

## Supplementary Figure 2

### Lymphoid Cell Population Gating Strategy

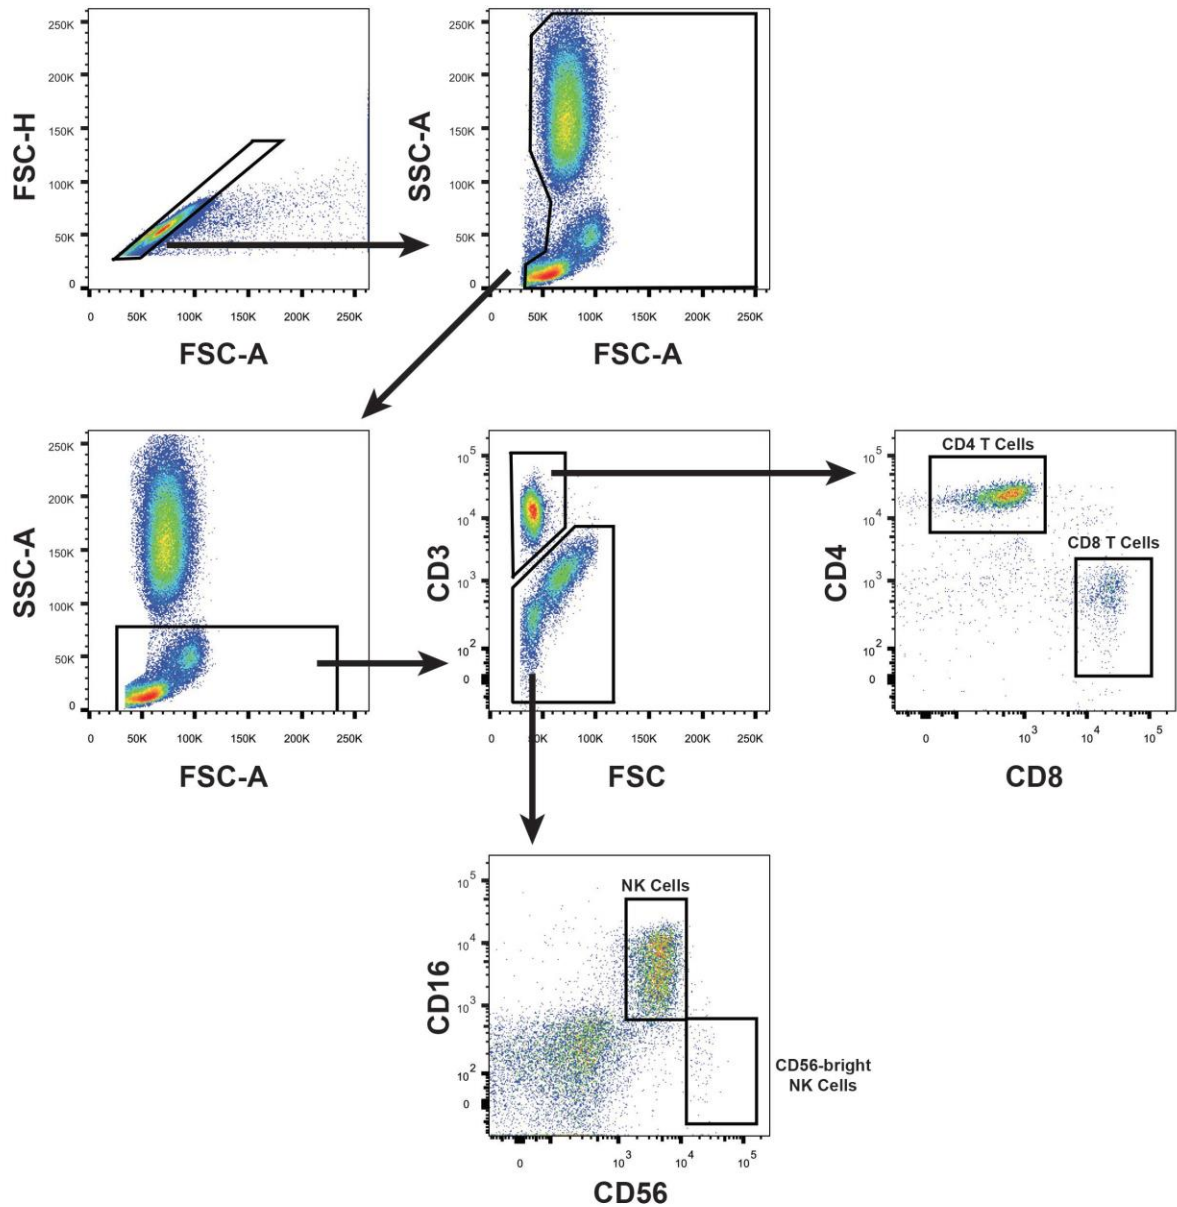

**Supplementary Figure 2.** Following isolation, peripheral blood immune cells were stained with a combination of CD3, CD4, CD8, CD16, and CD56. Doublets and debris were first excluded, and then SSC-low cells were selected. Cells were divided into CD3+ and CD3- populations; CD3+ cells were analyzed for CD4 and CD8 expression while CD3- cells were analyzed for CD56 and CD16 expression to assess NK cell levels.



### Supplementary Figure 3

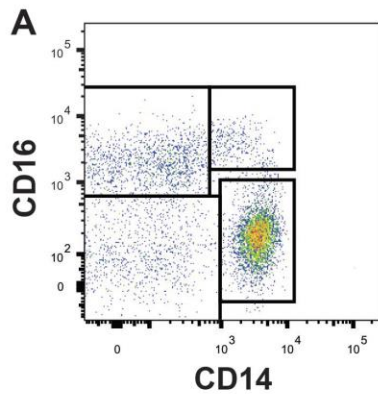

**Supplementary Figure 3.** (A) CD11b+ myeloid cells were subgated into four populations based on CD14 and CD16 expression. (B) Expression of myeloid surface markers in each of the four populations was assessed. Gray peaks indicate isotype controls, while solid black lines indicate surface marker expression.

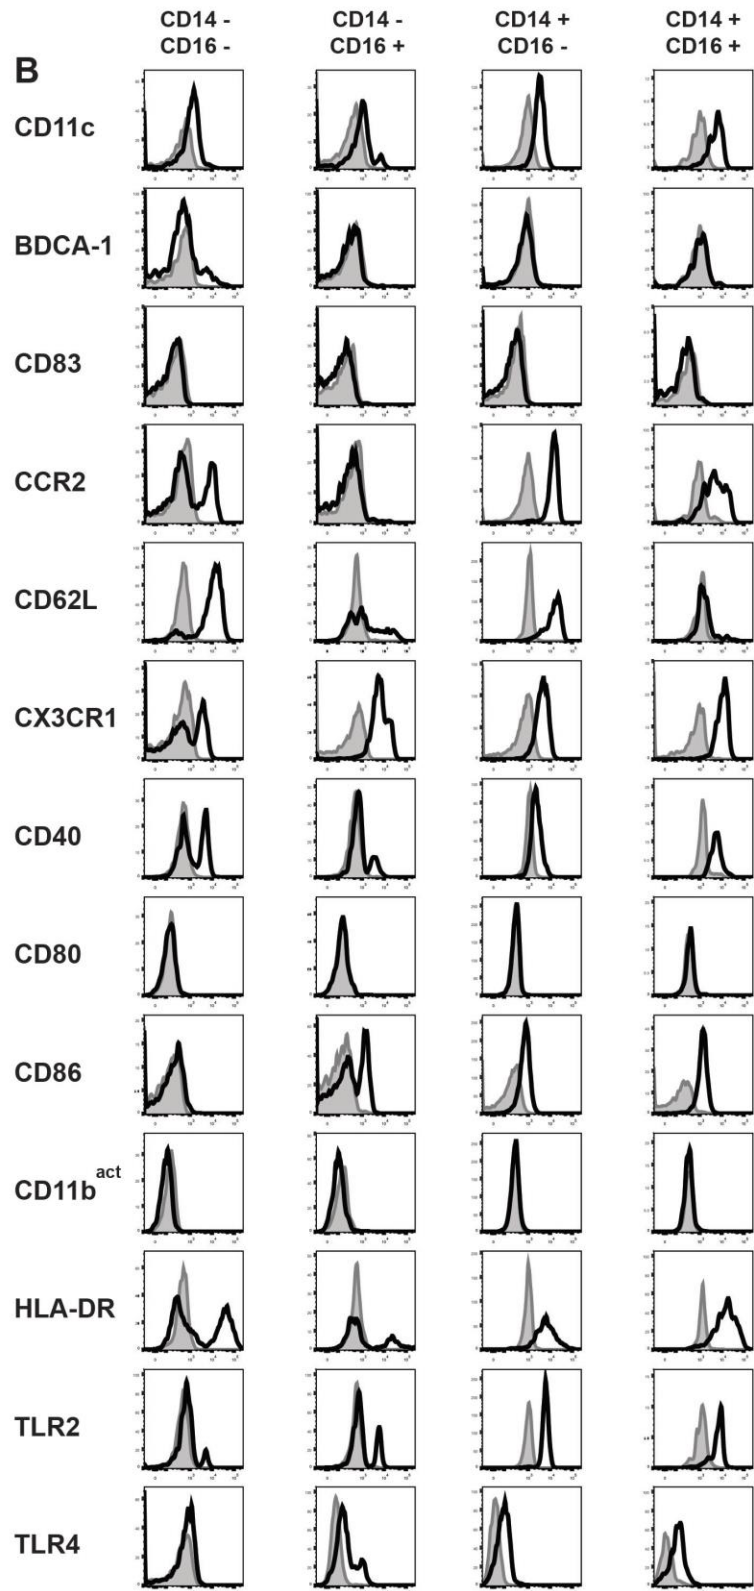

## Supplementary Figure 4

**Supplementary Figure 4.** Changes in immune cell subpopulations in ALS participants. (A) The time from ALS onset and (B) participant ALSFRS-R score was calculated for each participant visit and plotted vs. population number over multiple visits. Black lines represent changes between visits. Red lines represent the average number of cells in control participant (solid line)  $\pm$  1 standard deviation (dashed lines). These lines are intended as reference points and do not indicate change over time, as control participants did not make multiple visits to the clinic. ALS participants with a single visit to the clinic are not included in the kinetic data.

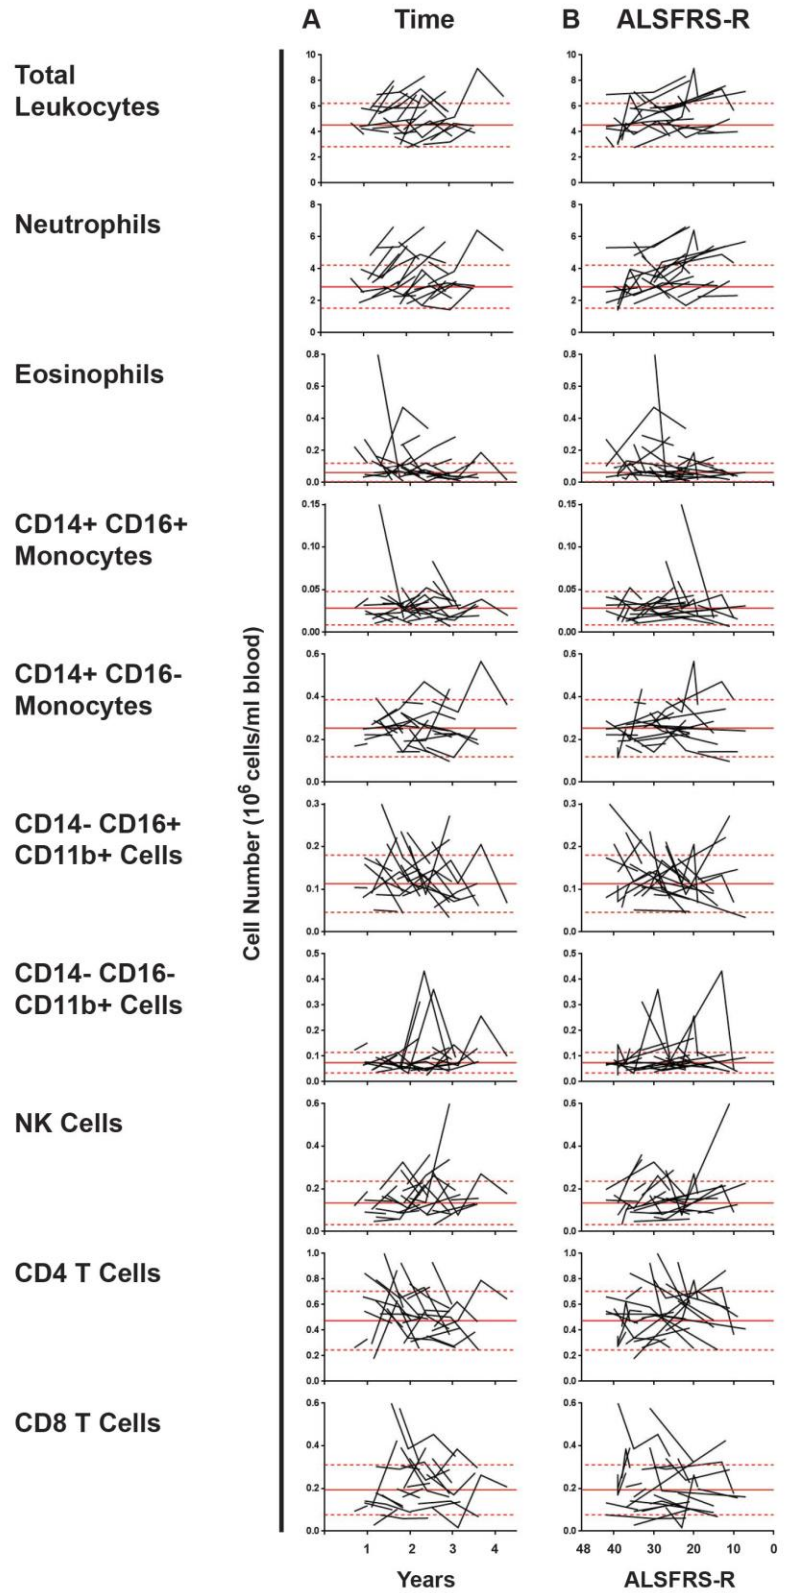



**Supplementary  
Figure 5**

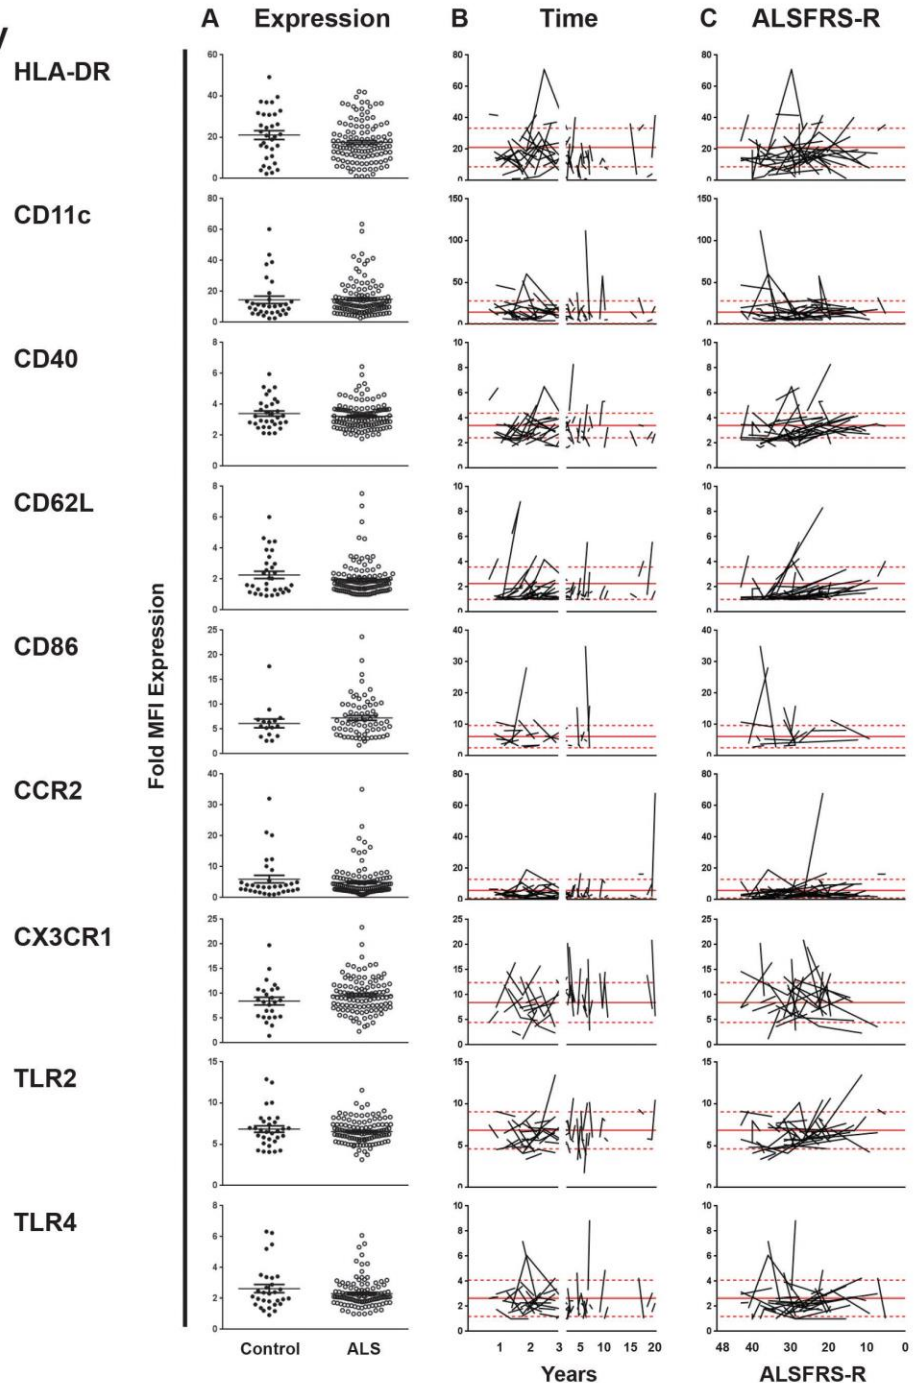

**Supplementary Figure 5.** Total number and changes in CD11b+ CD14+ CD16+ cell subpopulations in ALS participants. (A) The total number of cells in CD11b+ CD14+ CD16+ cell subpopulations was calculated for each ALS participant by first averaging the population numbers at each visit to create a single value per participant. Cell populations in ALS participants (open circles) were then compared to healthy control participants (filled circles). The mean and SEM is displayed for each population. (B) The time from ALS onset and (C) participant ALSFRS-R score was calculated for each participant visit and plotted vs. subpopulation number over multiple visits. Black lines represent changes between visits. Red lines represent the average number of cells in control participant (solid line)  $\pm 1$  standard deviation (dashed lines). These lines are intended as reference points and do not indicate change over time, as control participants did not make multiple visits to the clinic. ALS participants with a single visit to the clinic are not included in the kinetic data.

**Supplementary  
Figure 6**

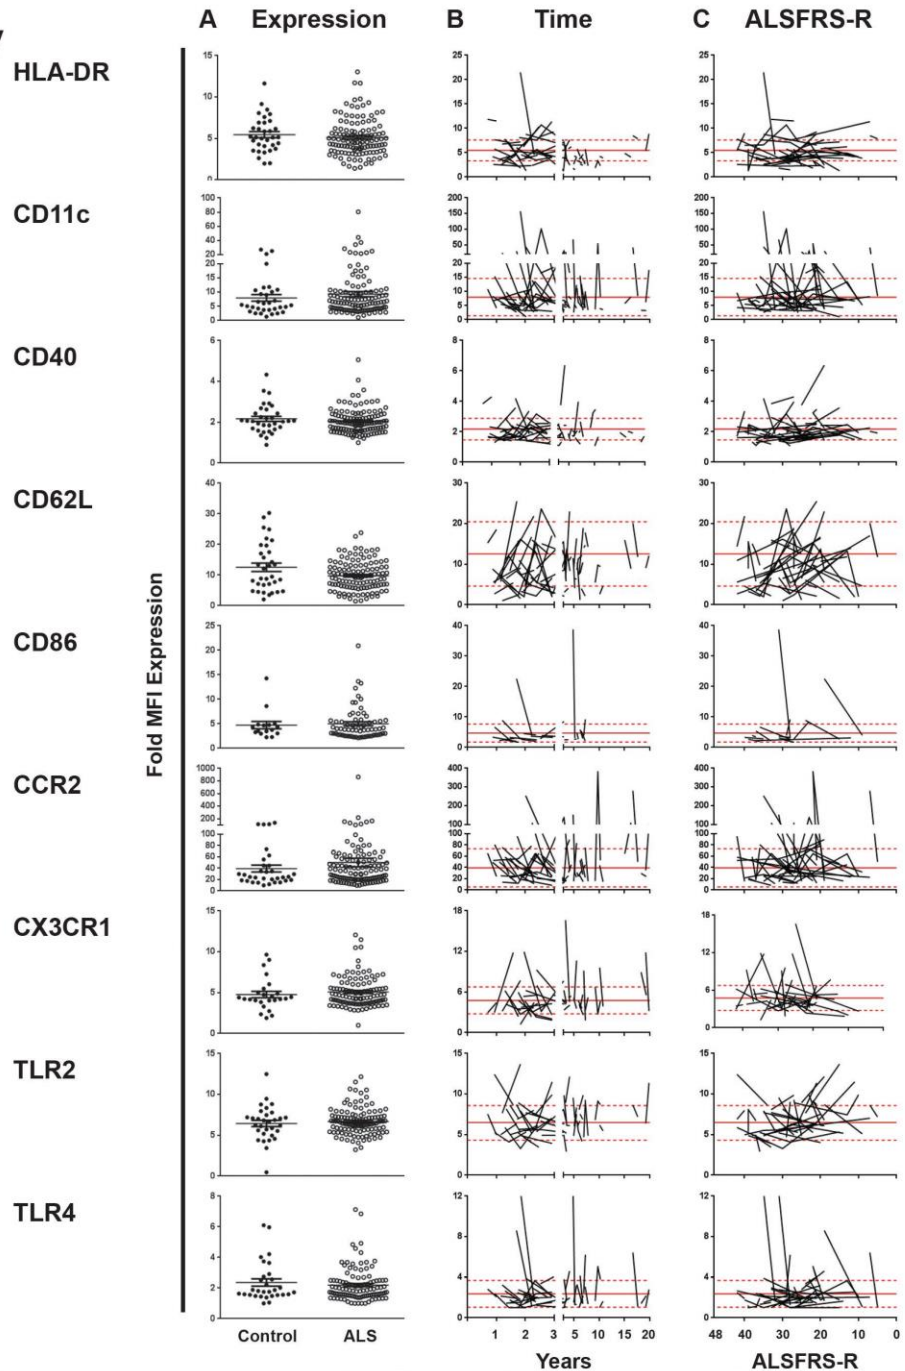

**Supplementary Figure 6.** Total number and changes in CD11b+ CD14+ CD16- cell subpopulations in ALS participants. (A) The total number of cells in CD11b+ CD14+ CD16- cell subpopulations was calculated for each ALS participant by first averaging the population numbers at each visit to create a single value per patient. Cell populations in ALS participants (open circles) were then compared to healthy control participants (filled circles). The mean and SEM is displayed for each population. (B) The time from ALS onset and (C) participant ALSFRS-R score was calculated for each participant visit and plotted vs. subpopulation number over multiple visits. Black lines represent changes between visits. Red lines represent the average number of cells in control participants (solid line)  $\pm$  1 standard deviation (dashed lines). These lines are intended as reference points and do not indicate change over time, as control participants did not make multiple visits to the clinic. ALS participants with a single visit to the clinic are not included in the kinetic data.

Supplementary  
Figure 7

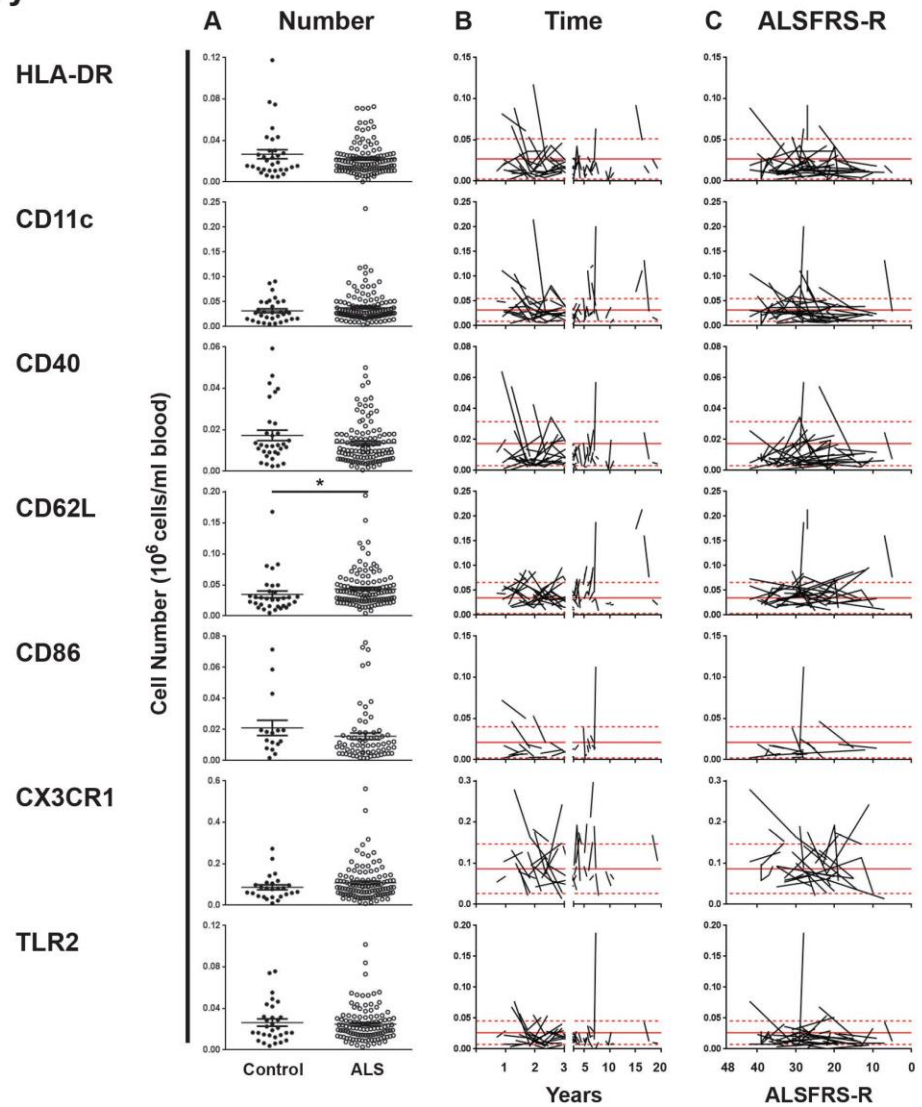

**Supplementary Figure 7.** Total number and changes in CD11b+ CD14- CD16+ cell subpopulations in ALS participants. (A) The total number of cells in CD11b+ CD14- CD16+ cell subpopulations was calculated for each ALS participant by first averaging the population numbers at each visit to create a single value per participant. Cell populations in ALS participants (open circles) were then compared to healthy control participants (filled circles). The mean and SEM is displayed for each population. \*  $P < .05$  (B) The time from ALS onset and (C) participant ALSFRS-R score was calculated for each participant visit and plotted vs. subpopulation number over multiple visits. Black lines represent changes between visits. Red lines represent the average number of cells in control participants (solid line)  $\pm 1$  standard deviation (dashed lines). These lines are intended as reference points and do not indicate change over time, as control participants did not make multiple visits to the clinic. ALS participants with a single visit to the clinic are not included in the kinetic data.



## Supplementary Figure 8

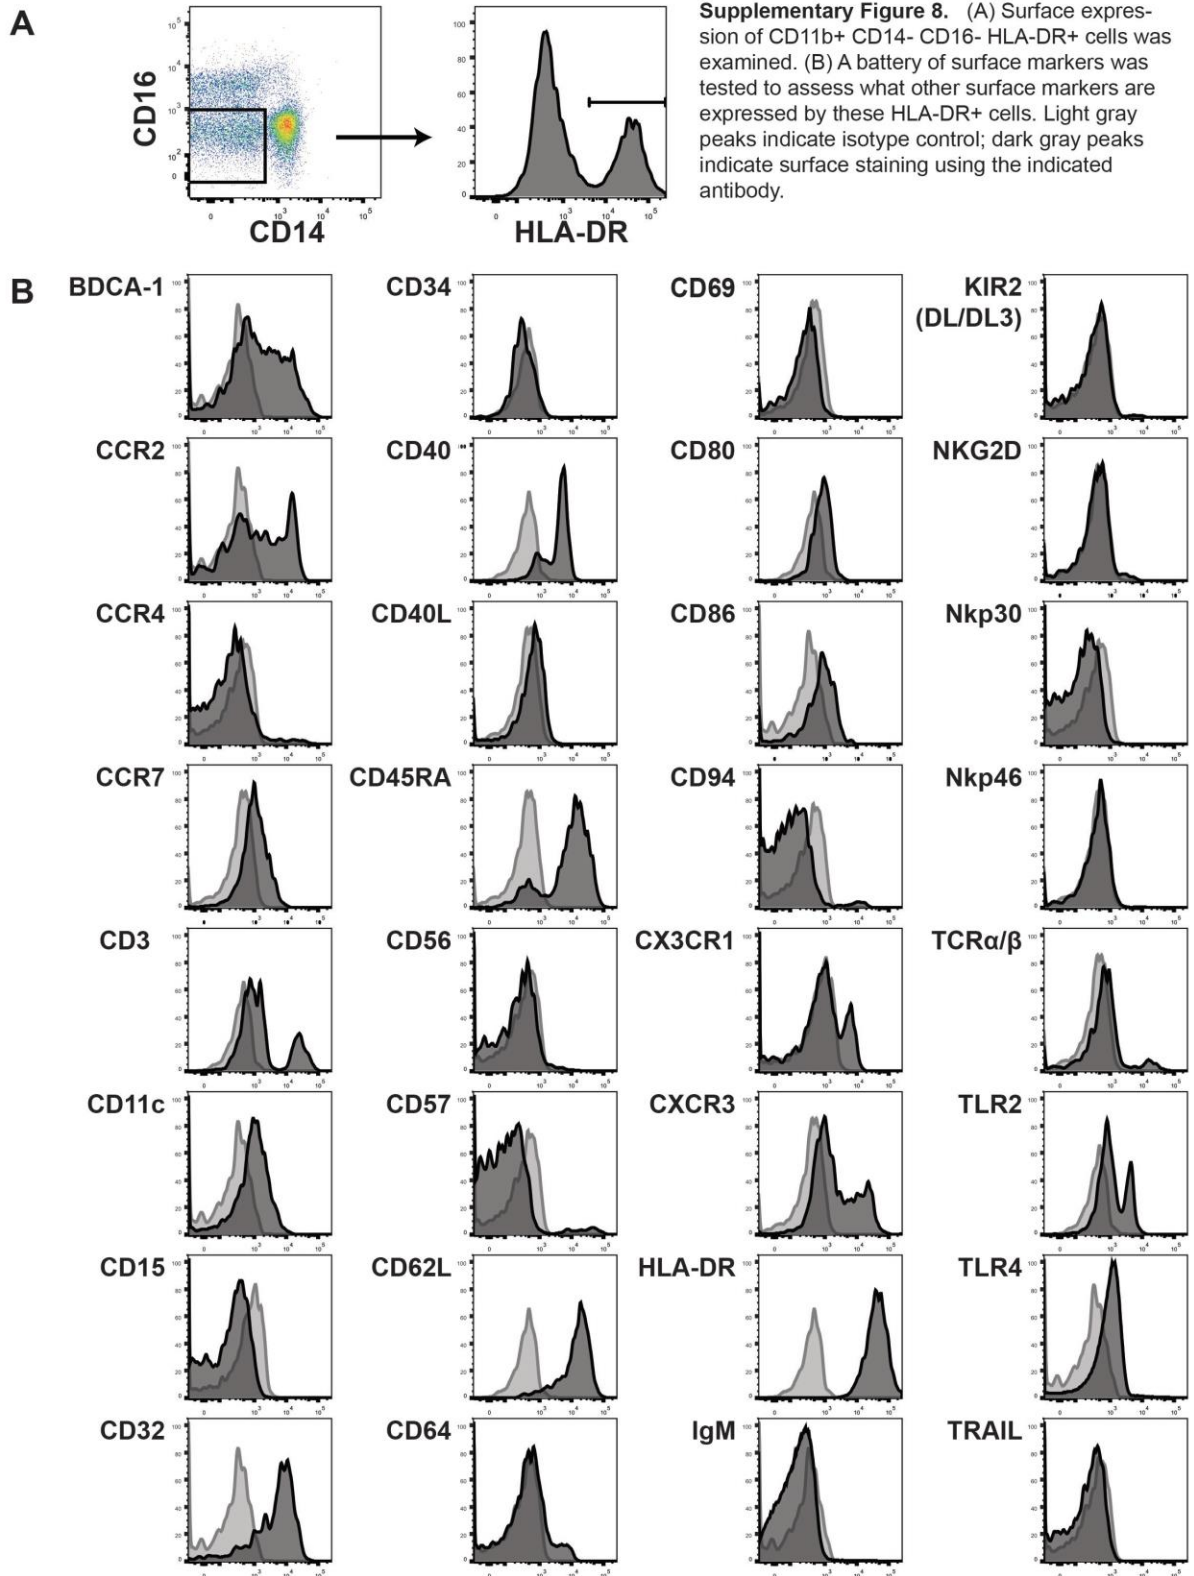

Supplement: jamaneurol-74-1446-s001.pdf [file jamaneurol-74-1446-s001.pdf]
